# Supplementary material
Source: ML conference proceedings conference paper supplement (https://openreview.net/forum?id=NRvxzOdSPU)

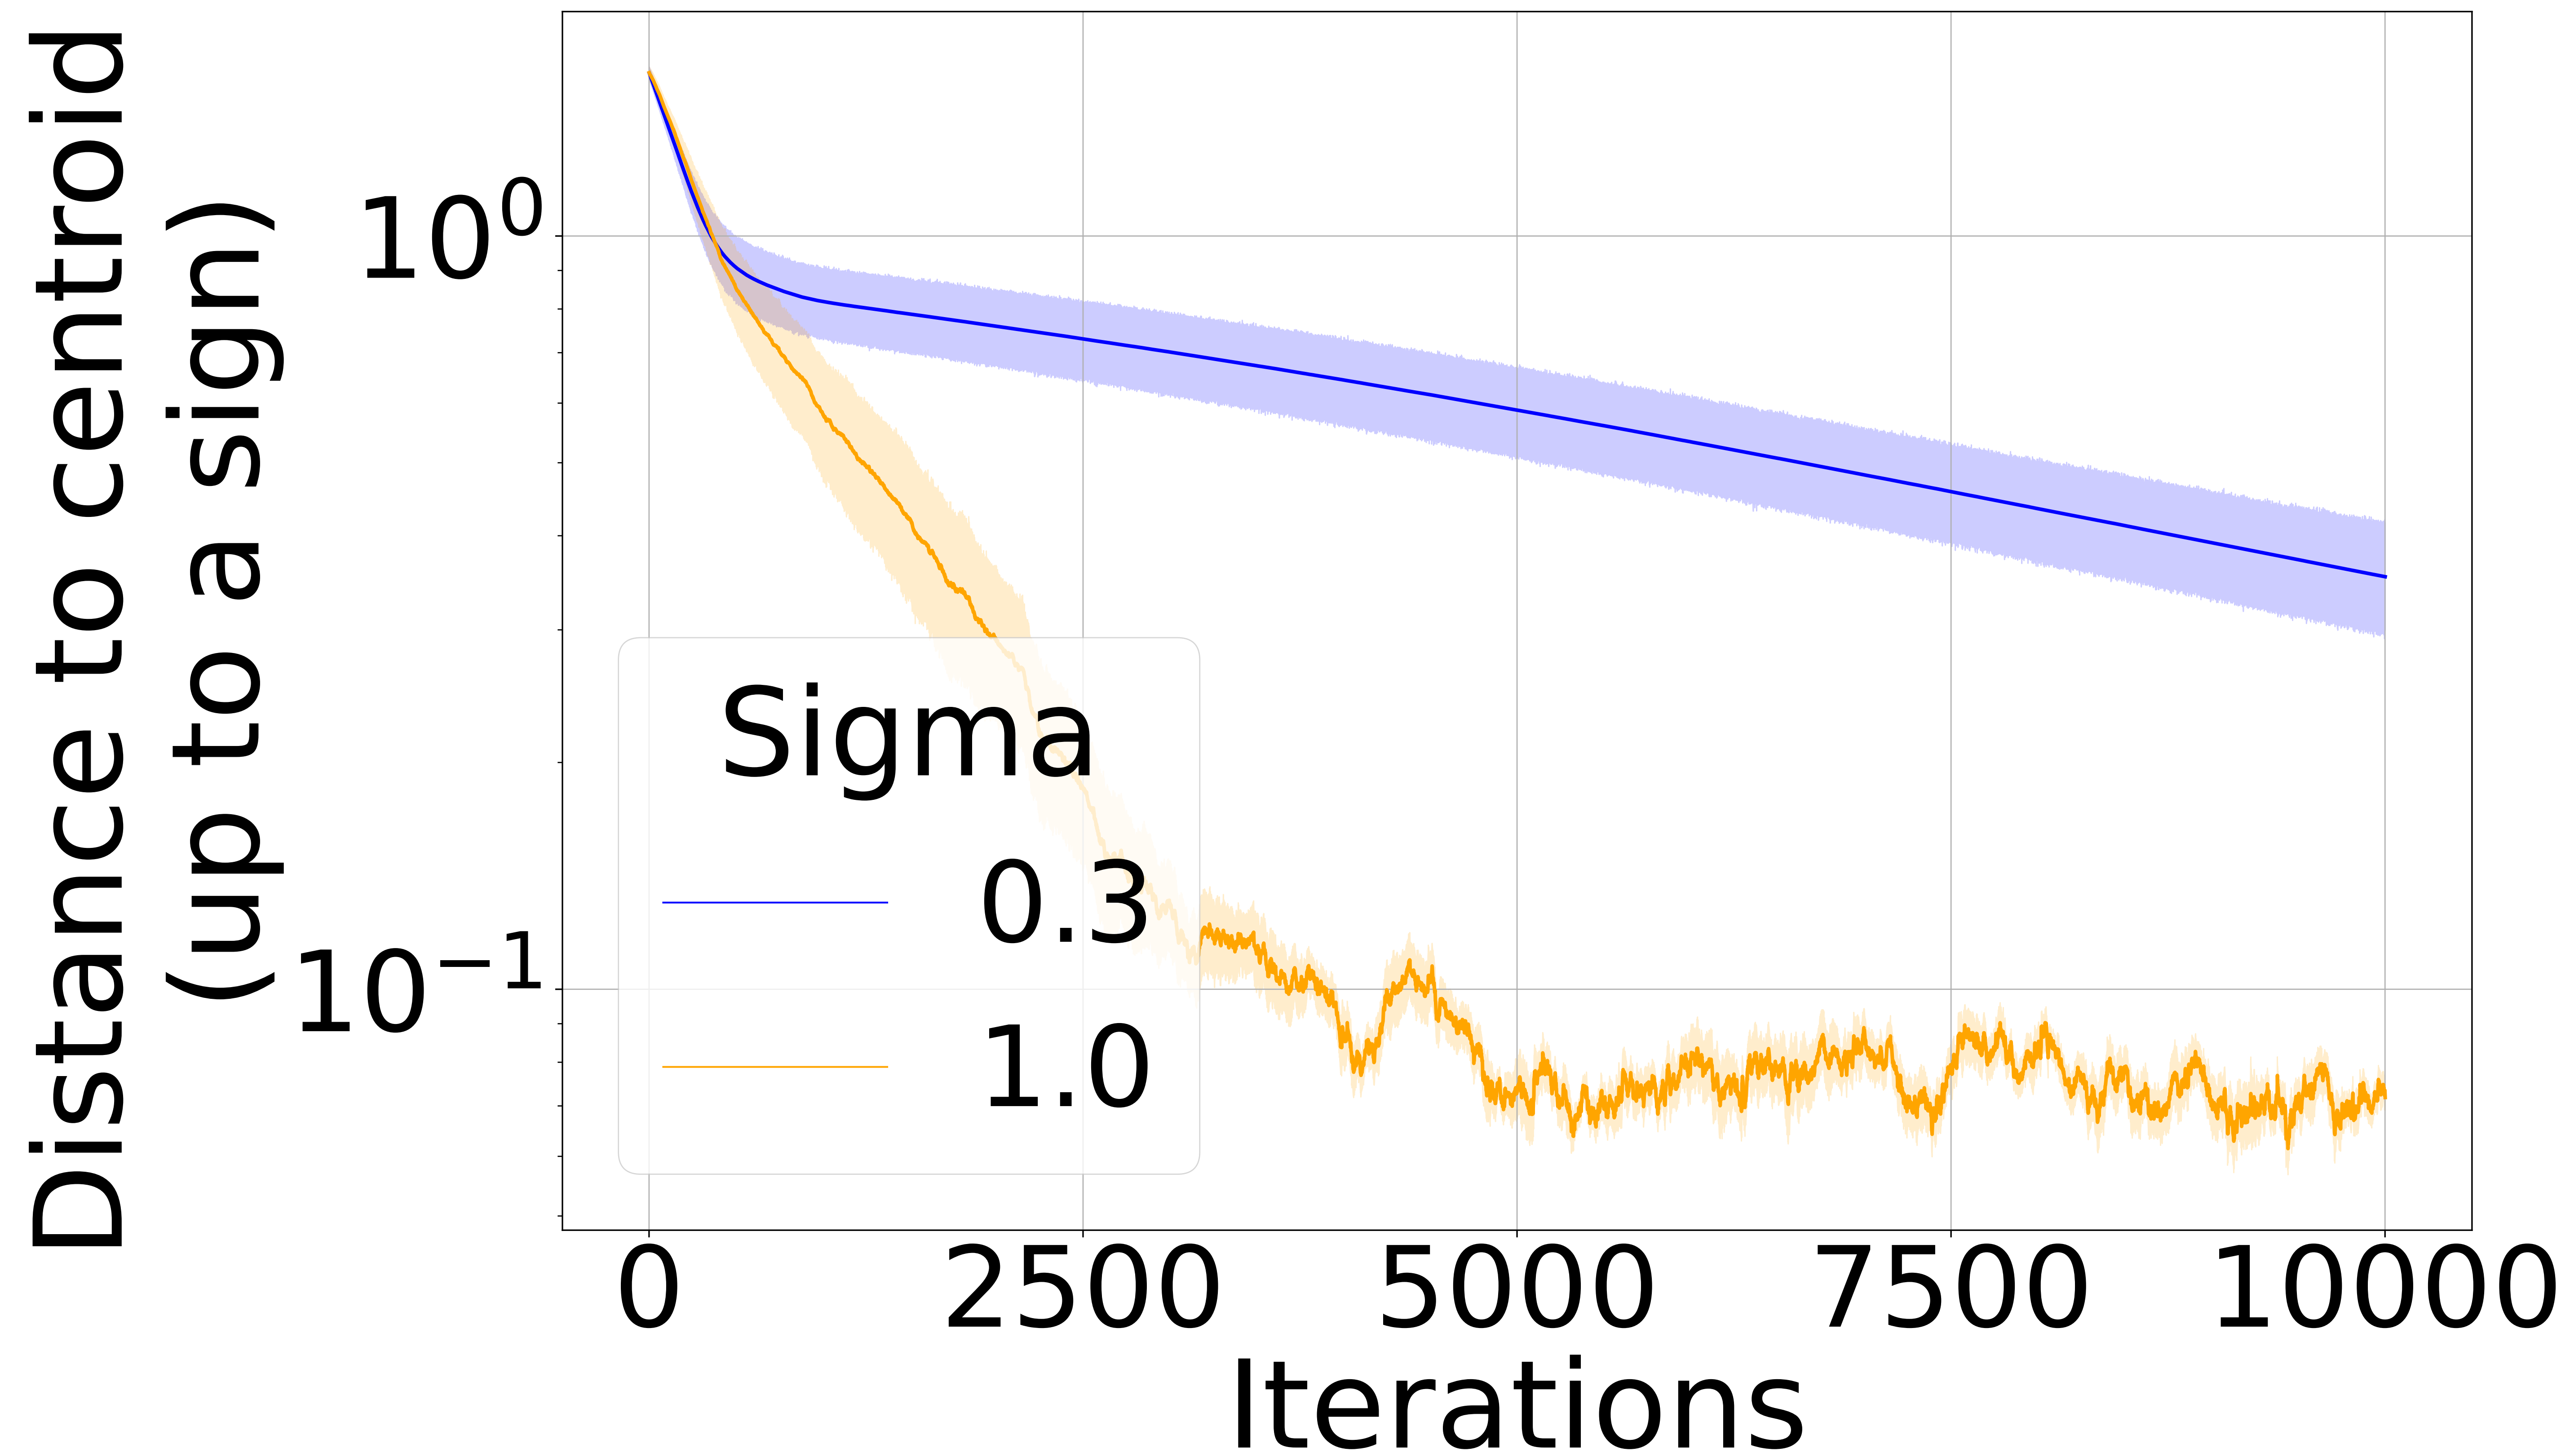

Supplement: supplementary_material [file plot_linear_iters_mixture3.pdf › submitted_numericals/experiments_mixture3/results/plot_linear_iters_mixture3.pdf]

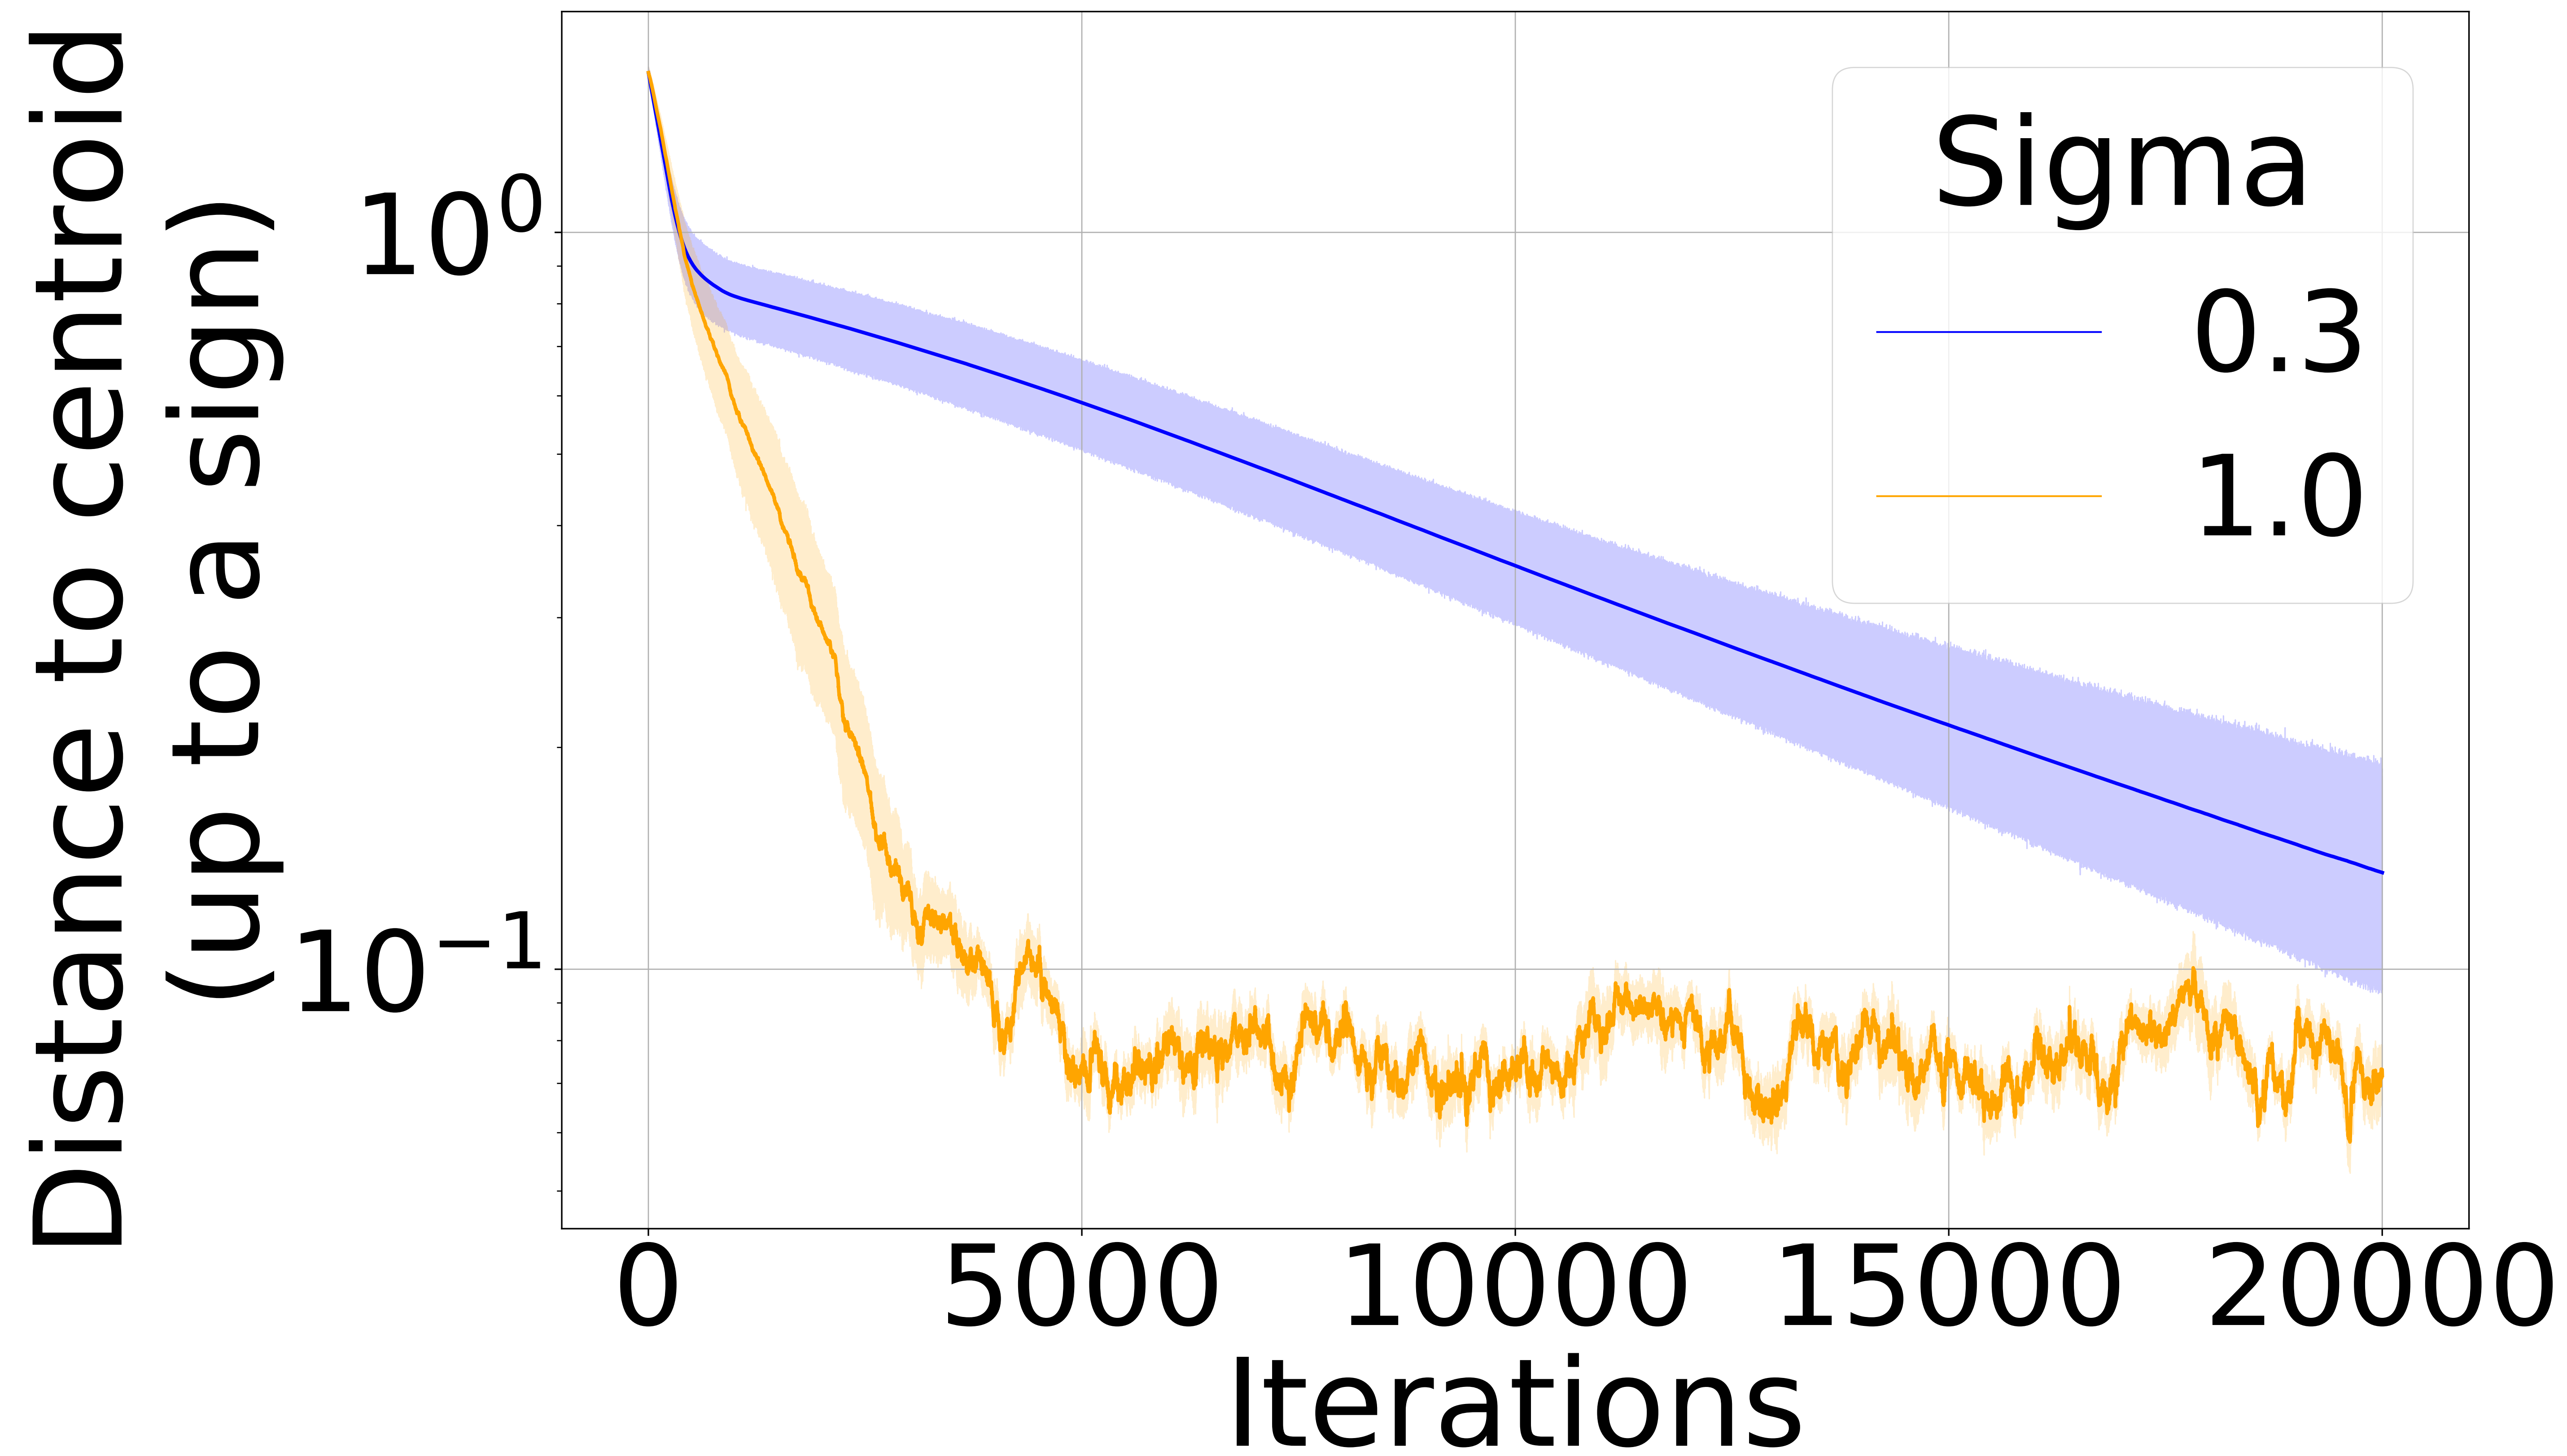

Supplement: supplementary_material [file plot_linear_iters_mixture3_20000.pdf › submitted_numericals/experiments_mixture3/results/plot_linear_iters_mixture3_20000.pdf]

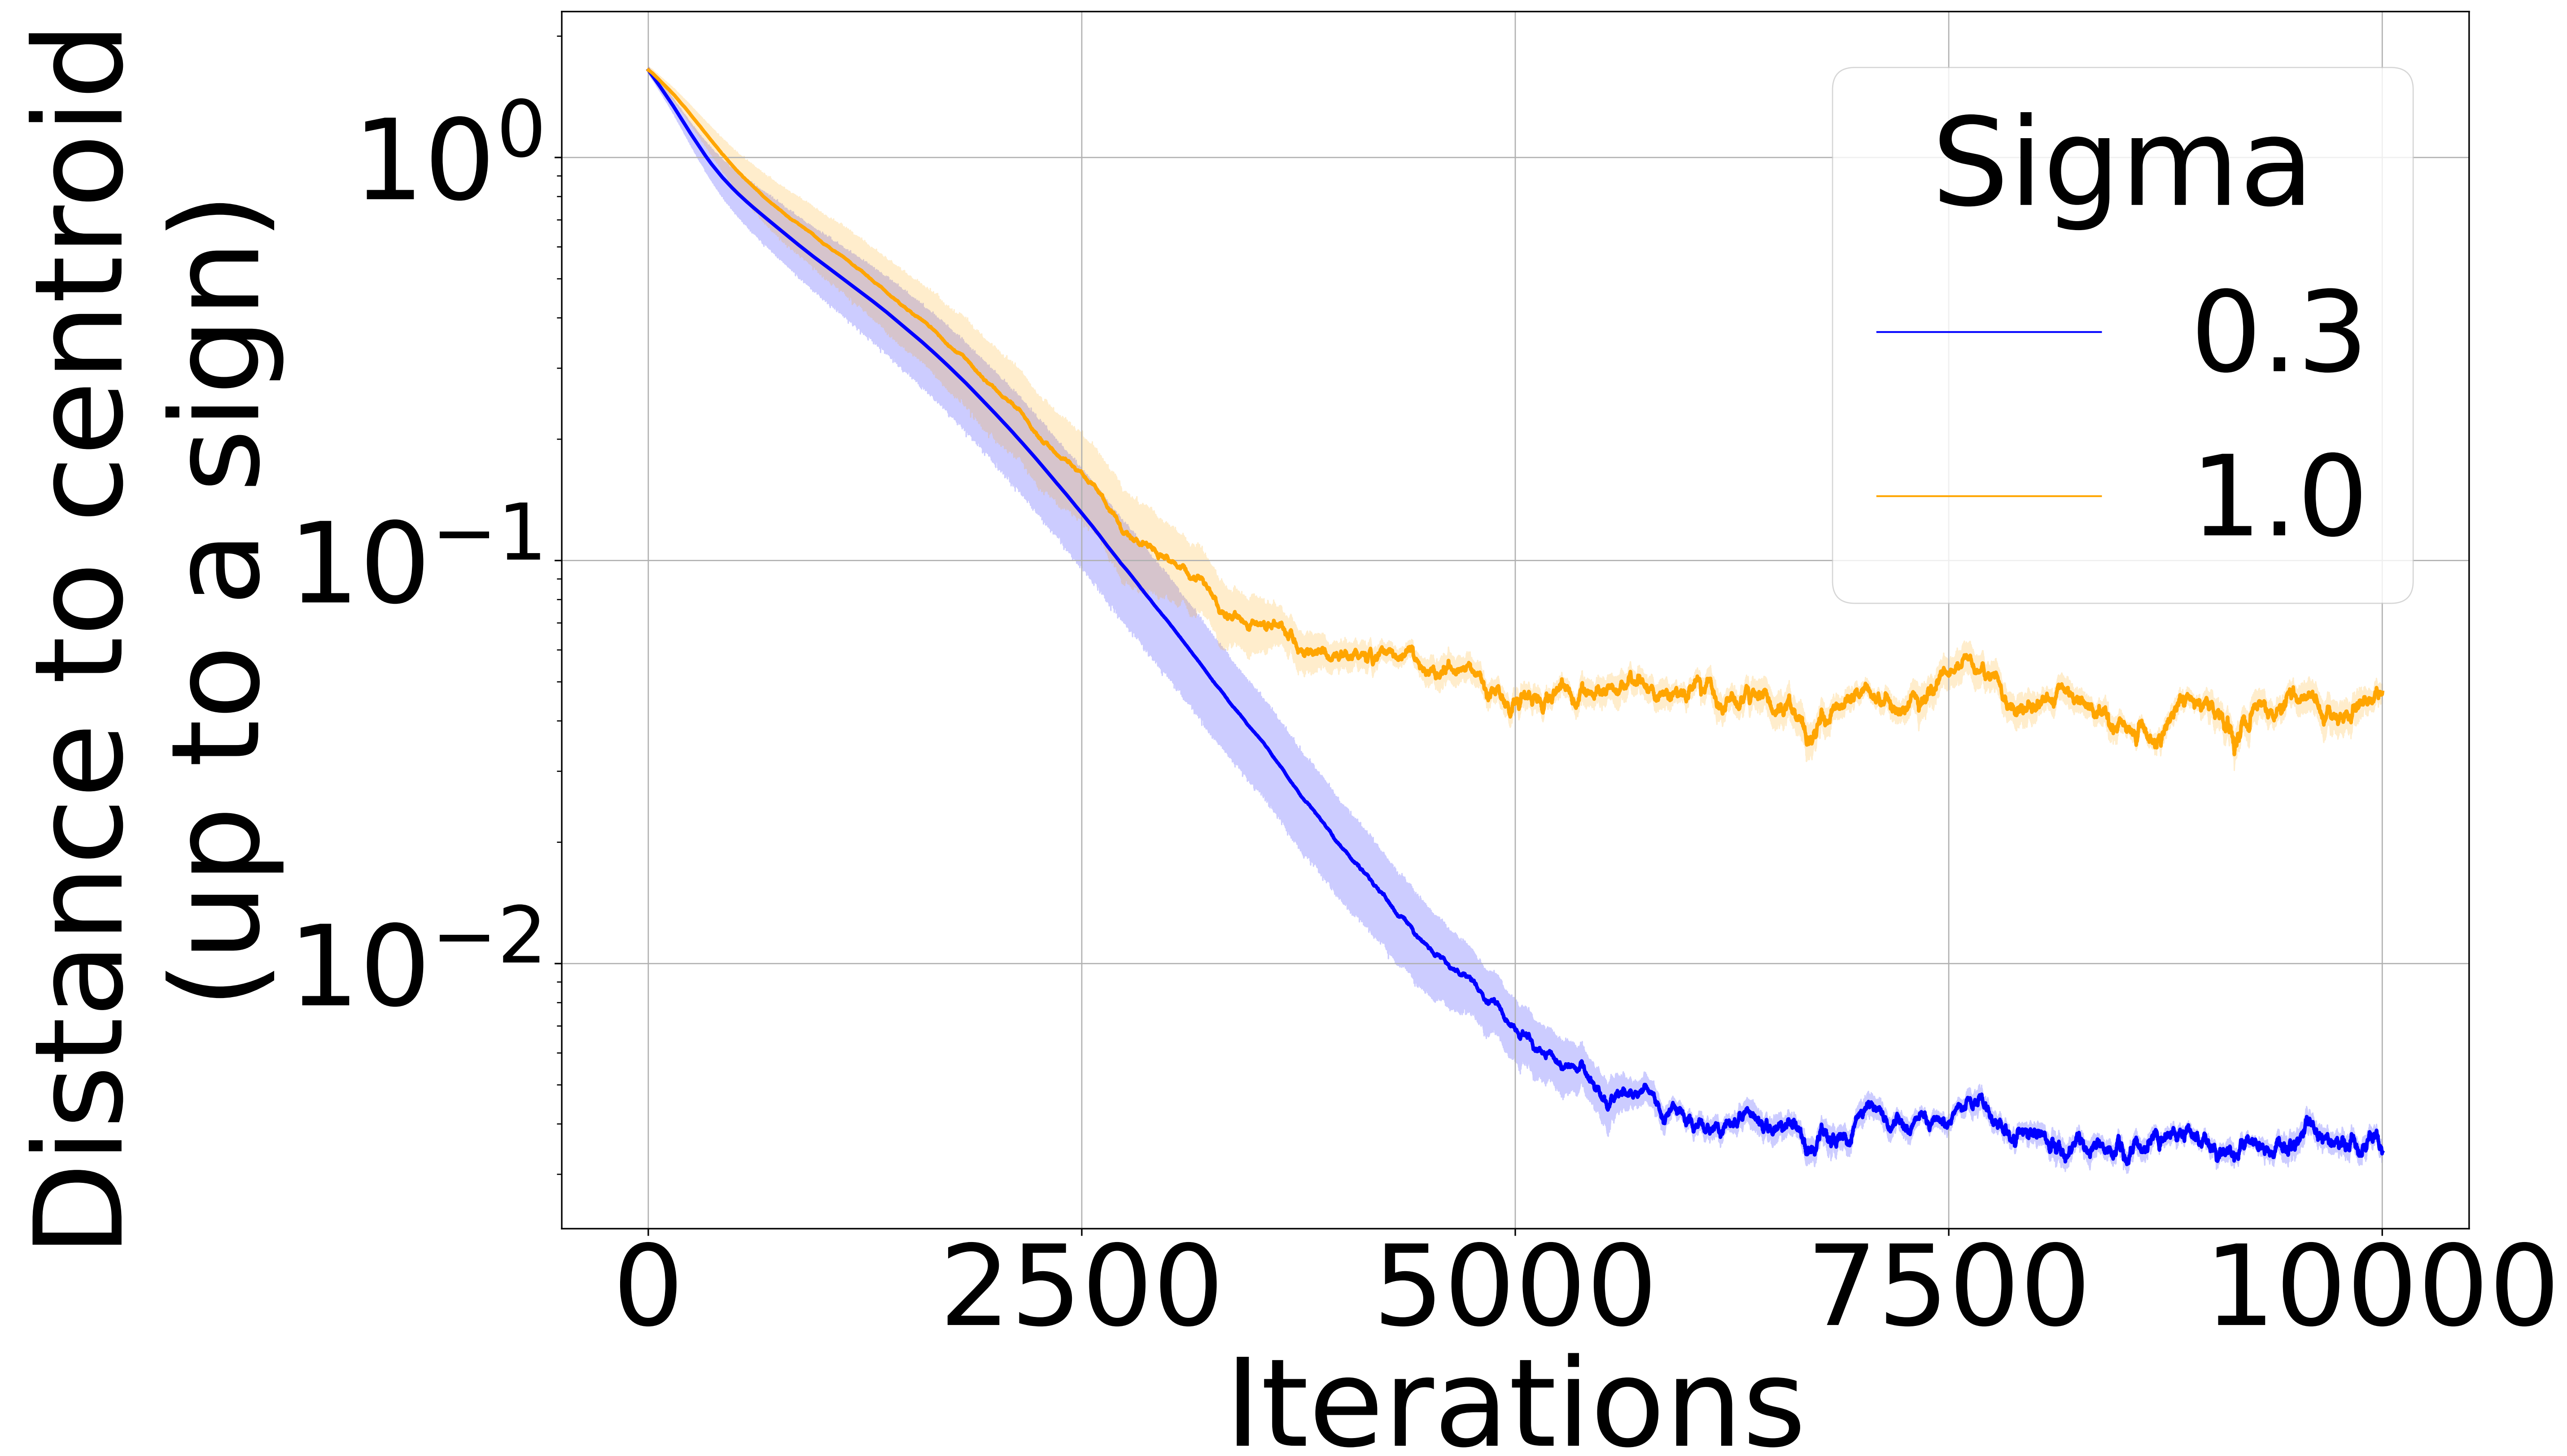

Supplement: supplementary_material [file plot_linear_iters_mixture3_reg.pdf › submitted_numericals/experiments_mixture3/results/plot_linear_iters_mixture3_reg.pdf]

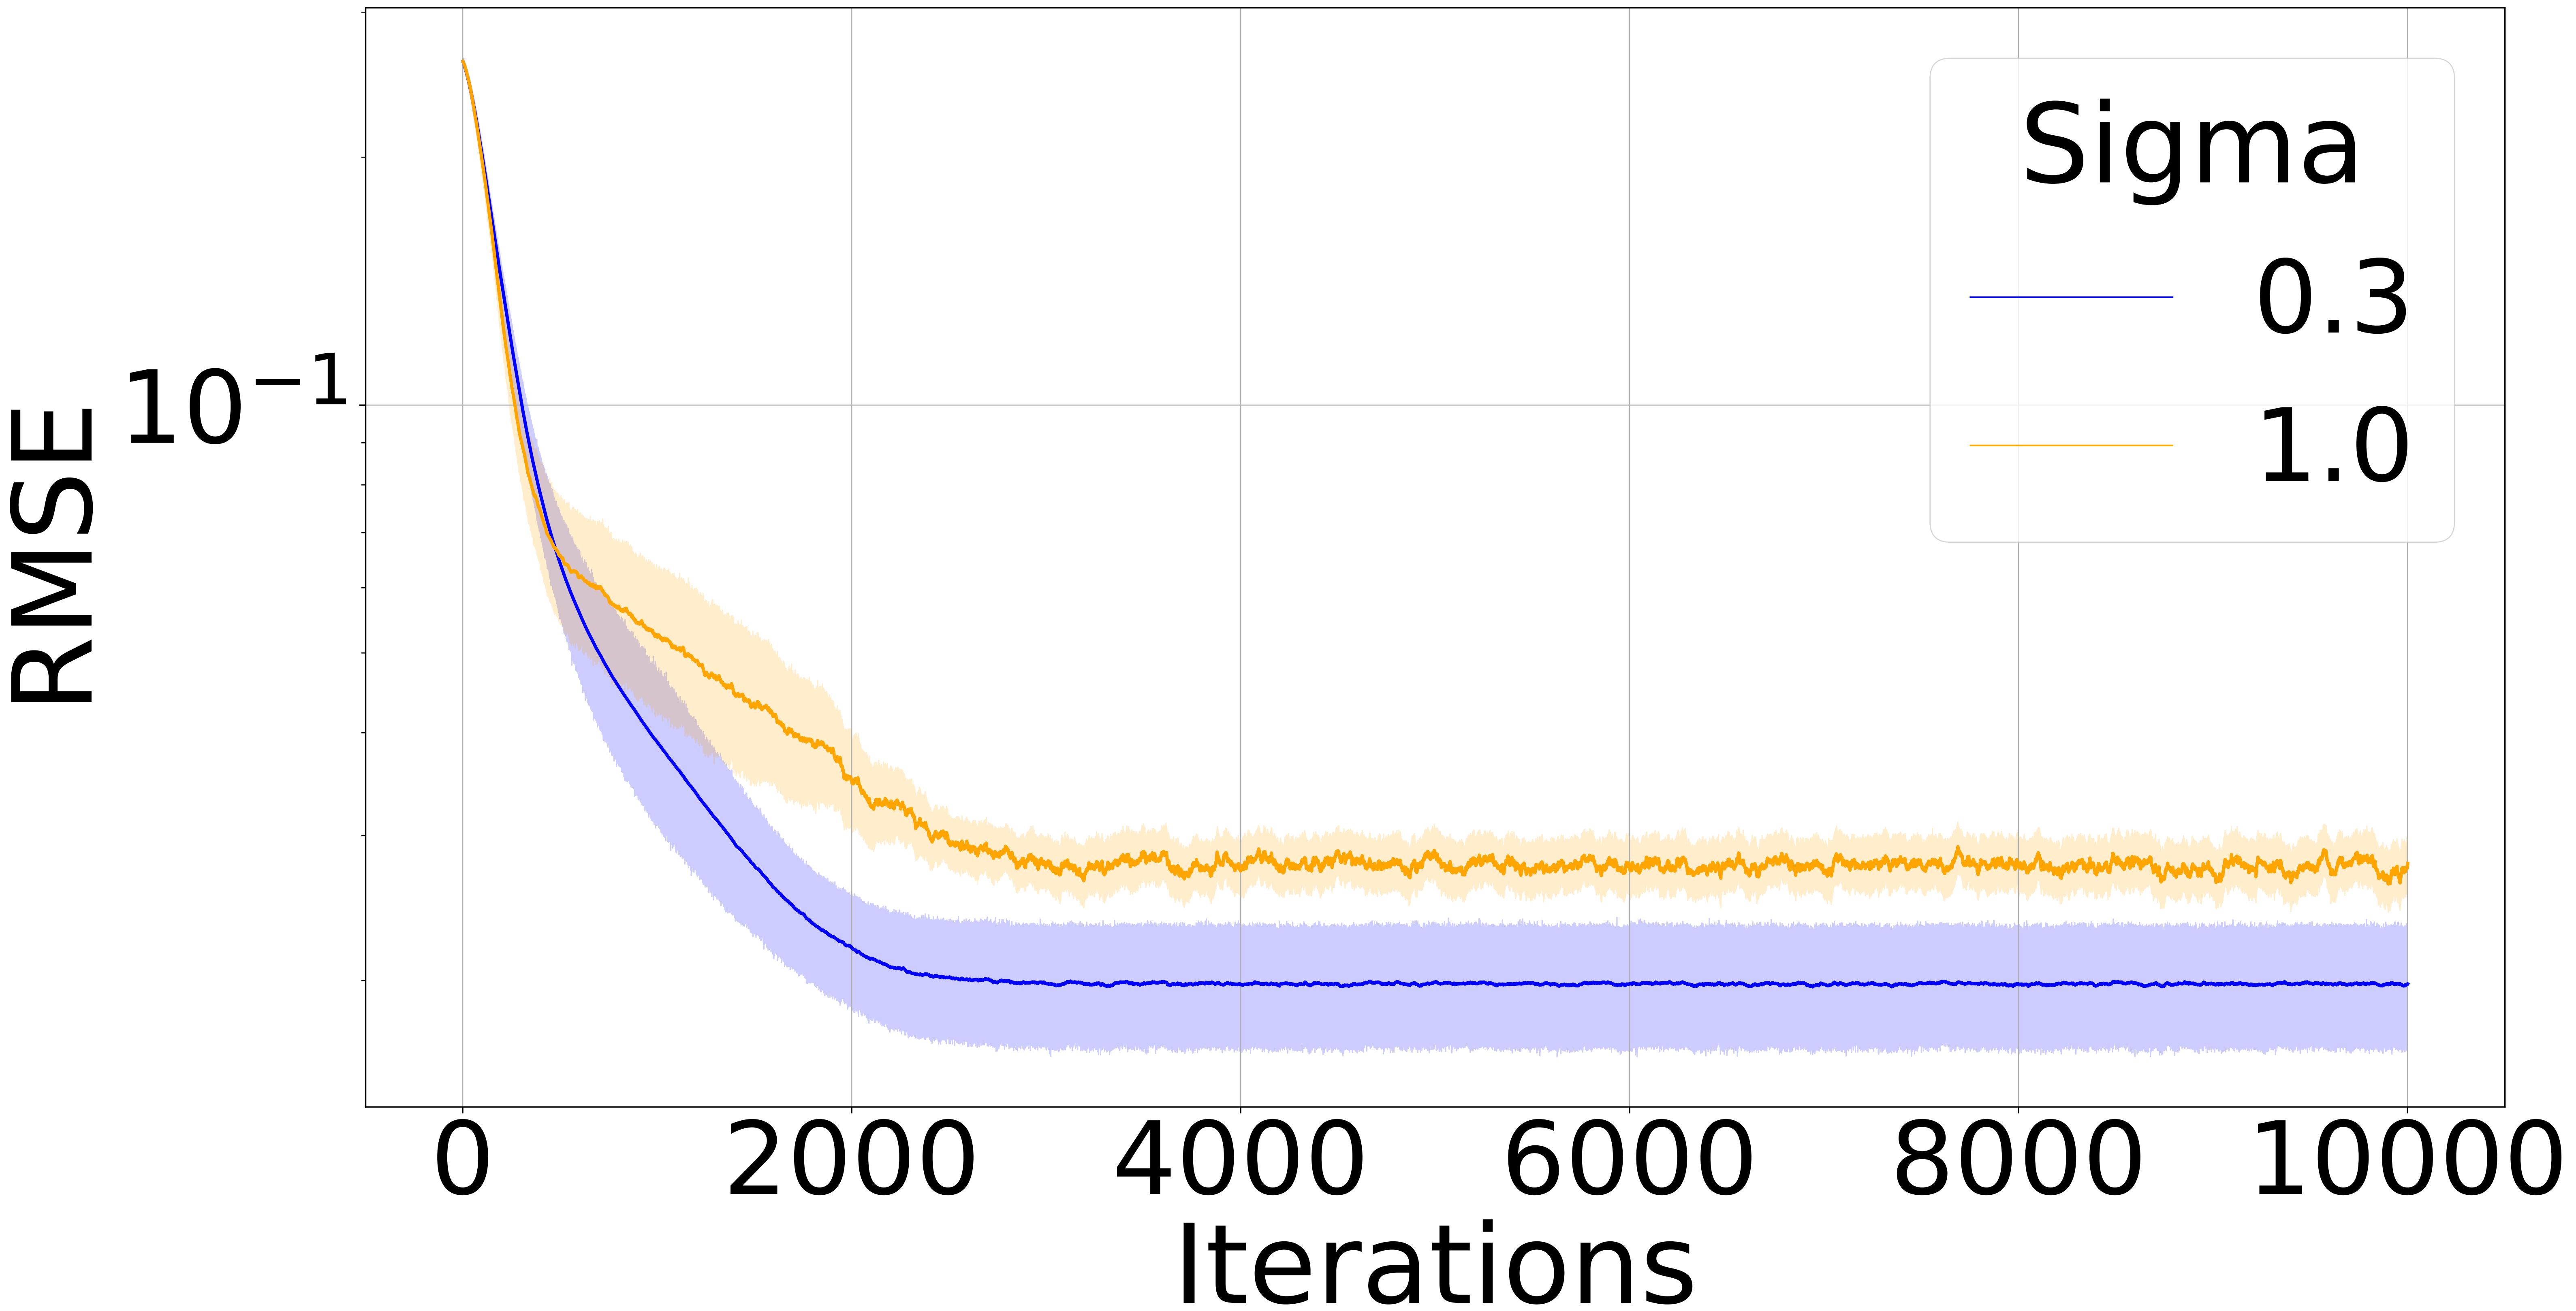

Supplement: supplementary_material [file plot_linear_iters_norm1centroid.pdf › submitted_numericals/experiments_norm1centroid/results/plot_linear_iters_norm1centroid.pdf]

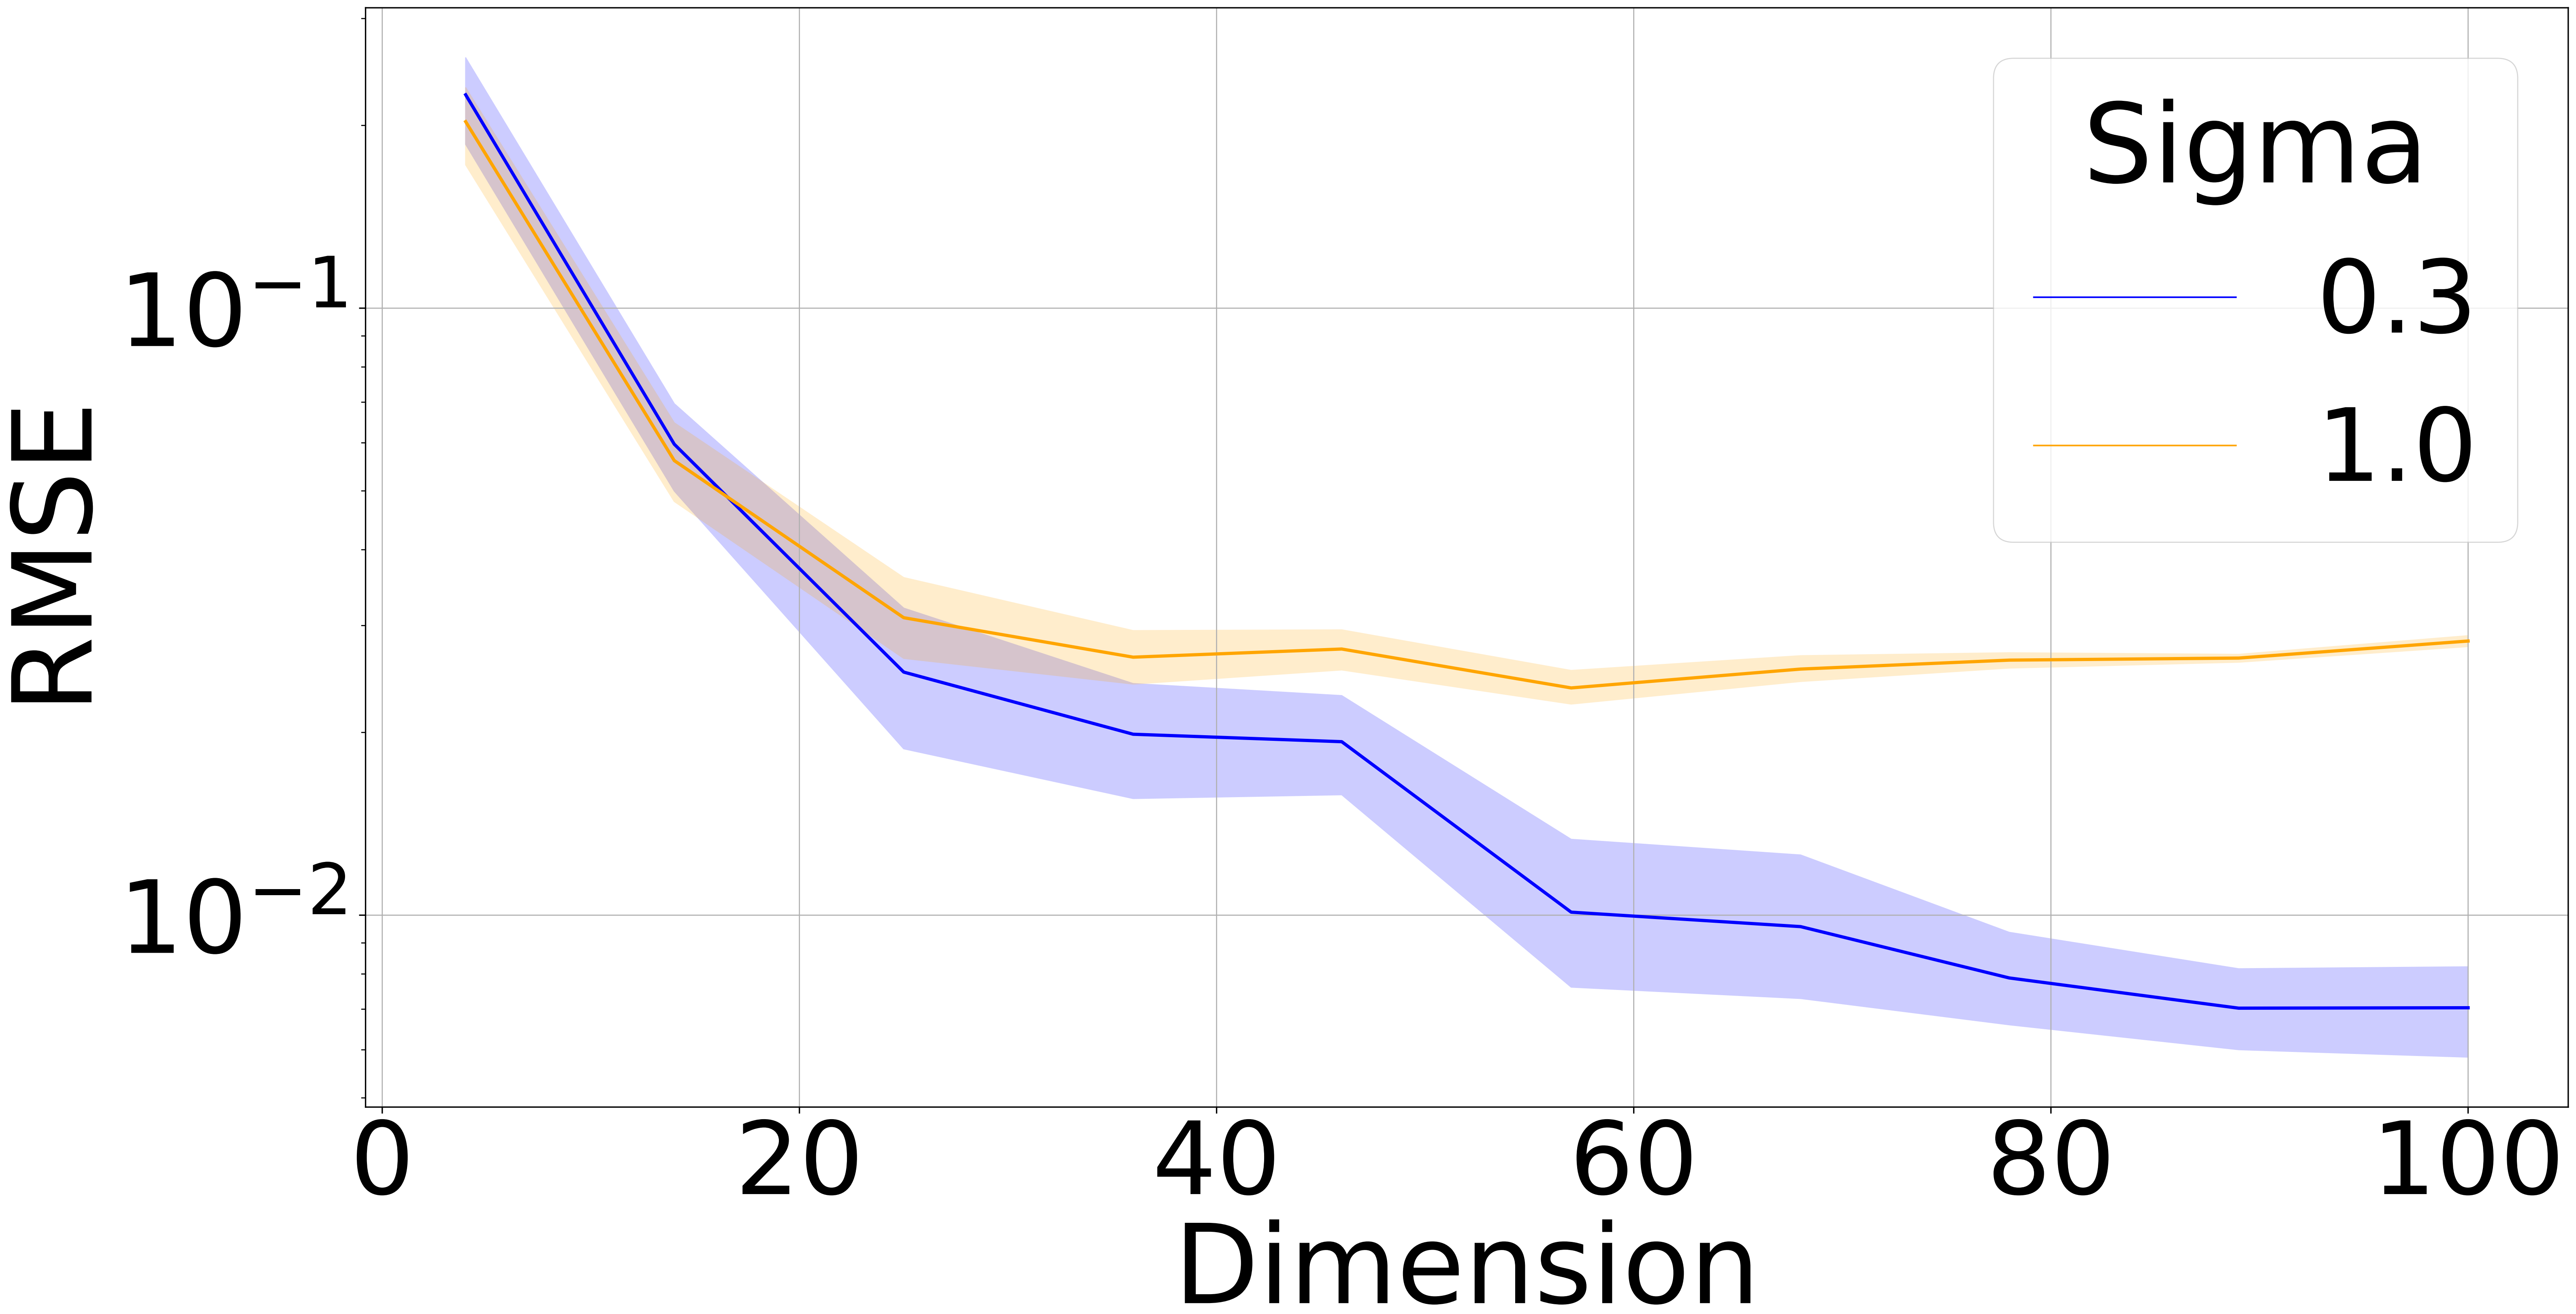

Supplement: supplementary_material [file plot_linear_iters_norm1centroid_changedim.pdf › submitted_numericals/experiments_norm1centroid/results/plot_linear_iters_norm1centroid_changedim.pdf]

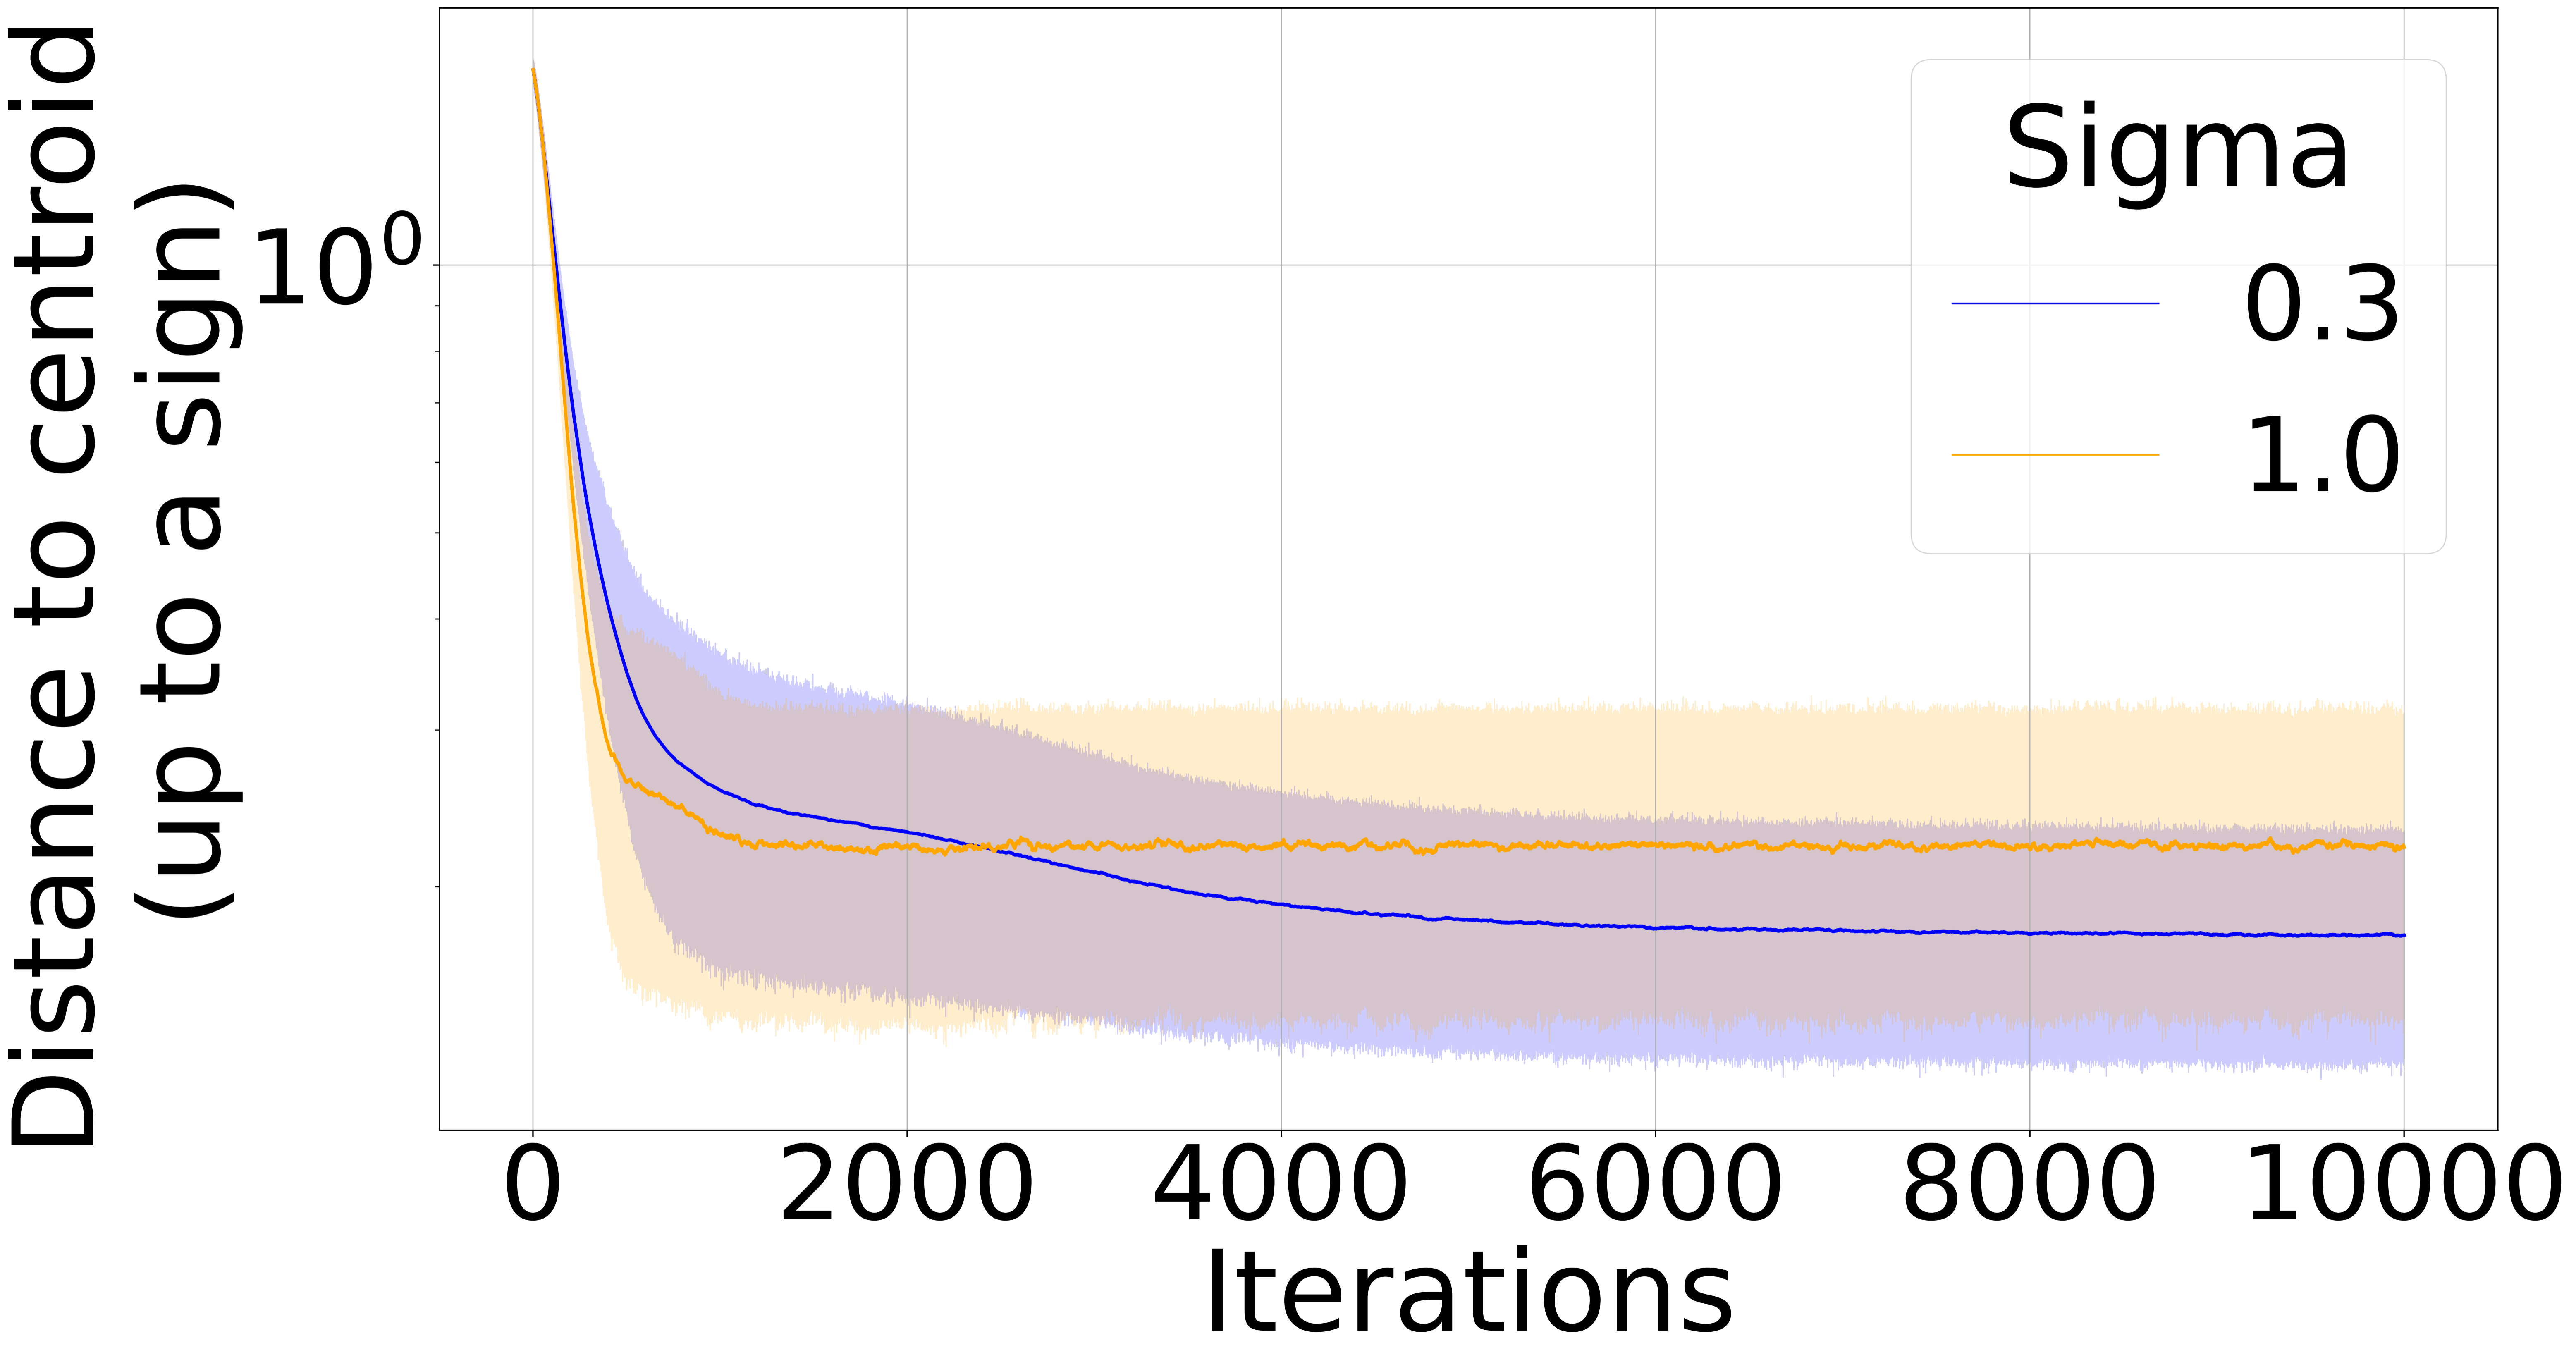

Supplement: supplementary_material [file plot_linear_manifold_iters_norm1centroid.pdf › submitted_numericals/experiments_norm1centroid/results/plot_linear_manifold_iters_norm1centroid.pdf]
